# Supplementary material for: N/O co-enriched graphene hydrogels as high-performance electrodes for aqueous symmetric supercapacitors
Source: Royal Society of Chemistry journal article supplement (doi:10.1039/d1ra01863a), 2021-01-01
Supplement: d1ra01863a1.pdf [file d1ra01863a1.pdf]

## Supporting Information

### **N/O co-enriched graphene hydrogels as high-performance electrodes for aqueous symmetric supercapacitors**

Yong Zhang,<sup>\*a,c</sup> Liang Wei,<sup>a,c</sup> Xijun Liu,<sup>a,c</sup> Wenhui Ma,<sup>b</sup> Jiankai Wang,<sup>b</sup> and Shan  
Fan<sup>\*a,c</sup>

a. College of Materials Science and Engineering, Graphene Functional Materials Research Laboratory, Qiqihar University, Qiqihar 161006, P. R. China. E-mail: leon1981@163.com (Y. Zhang), 15804528735@163.com (S. Fan).

b. School of Chemistry and Chemical Engineering, Qiqihar University, Qiqihar 161006, P. R. China.

c. College of Materials Science and Engineering, Heilongjiang Province Key Laboratory of Polymeric Composition Material, Qiqihar University, Qiqihar, 161006, PR China.

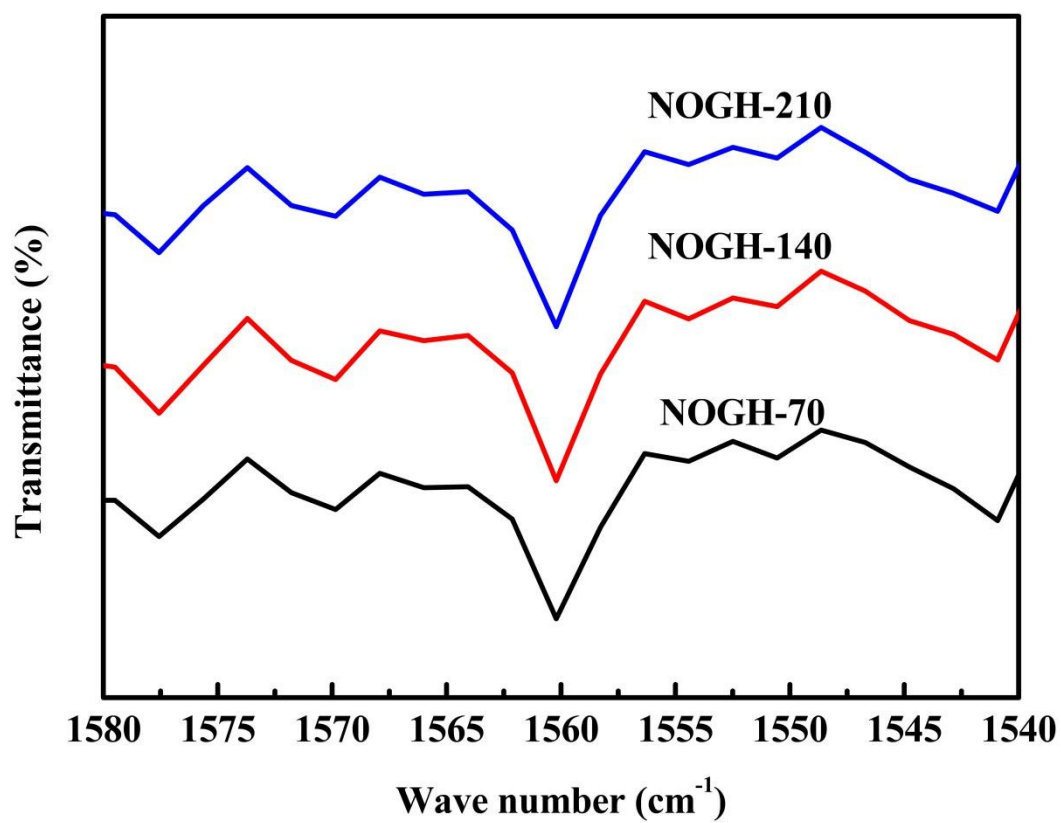

**Fig. S1** Zoom picture of C=N in FTIR.

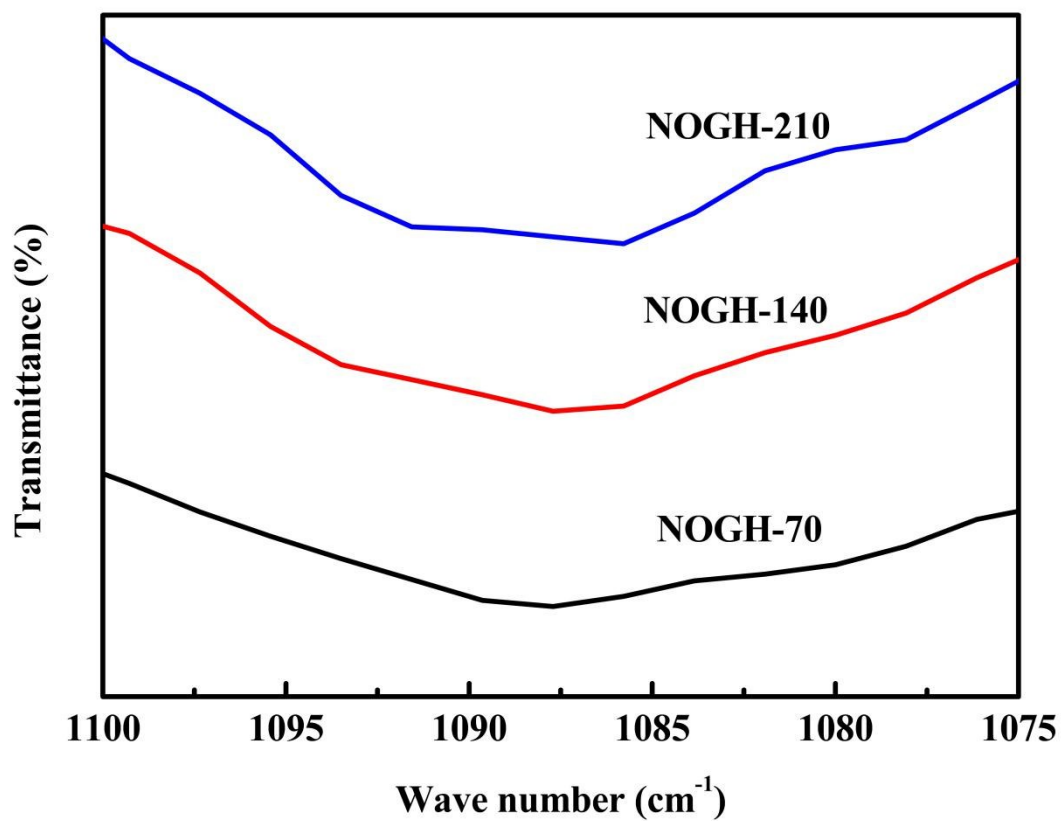

**Fig. S2** Zoom picture of C-N in FTIR.
